# Supplementary material for: AMPK-Dependent YAP Inhibition Mediates the Protective Effect of Metformin against Obesity-Associated Endothelial Dysfunction and Inflammation
Source: MDPI journal article supplement (doi:10.3390/antiox12091681), 2023-08-28
Supplement: s1 [file s1]

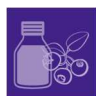

## Supplementary Materials

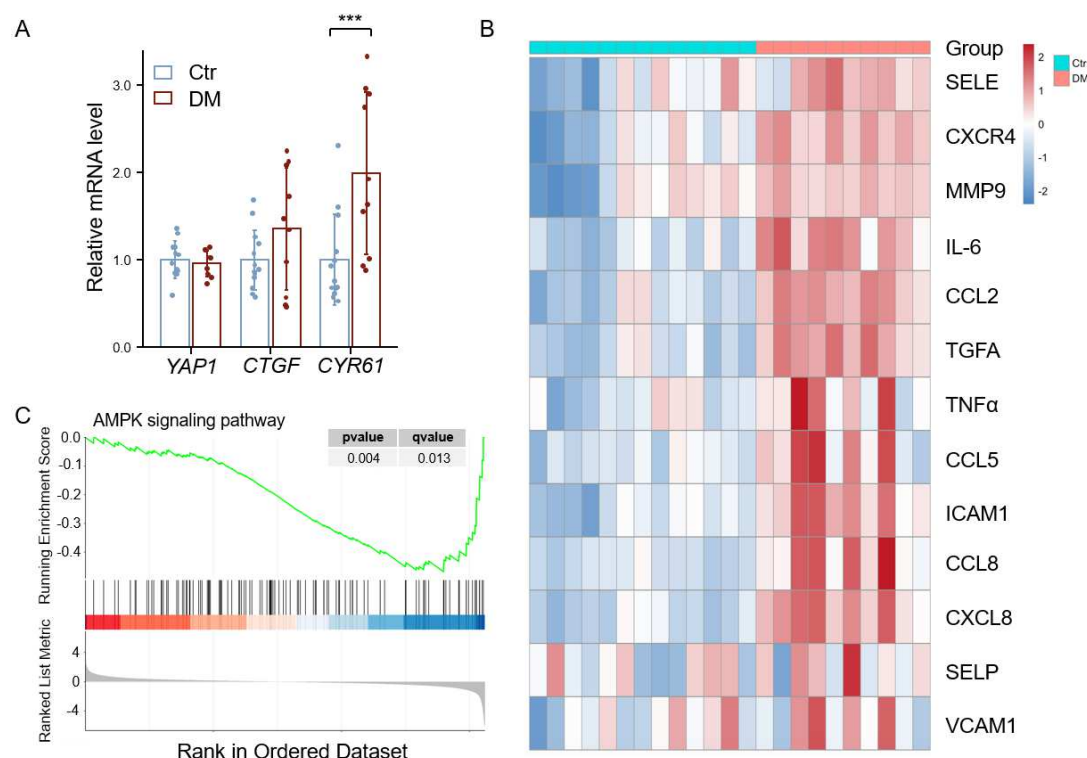

**Figure S1.** The expression of YAP signaling in diabetic coronary artery lesions. **(A)** The relative expression level of YAP target genes (CTGF and CYR61) in diabetic-hypercholesterolemic pigs (DM) compared with hypercholesterolemic pigs (Ctr). **(B)** Differential expression heatmap of vascular inflammatory factors including chemokines, adhesion molecules, cytokines and formins. **(C)** GSEA result of KEGG pathway: AMPK signaling pathway downregulated in diabetic group. GSEA: Gene set enrichment analysis; KEGG: Kyoto Encyclopedia of Genes and Genomes. Data are means  $\pm$  SD. \*\*\*  $p < 0.001$ .

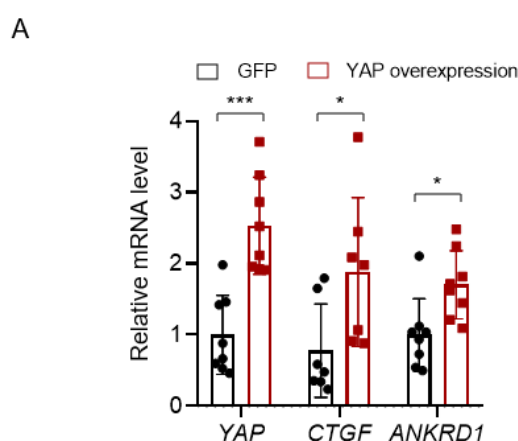

**Figure S2.** Expression efficiency of YAP adenovirus in isolated aortic rings. **(A)** Quantification of the mRNA expression of YAP and target genes (CTGF and ANKRD1) in isolated aortic rings infected by YAP adenovirus. Data are means  $\pm$  SD. \*  $p < 0.05$ , \*\*\*  $p < 0.001$ .

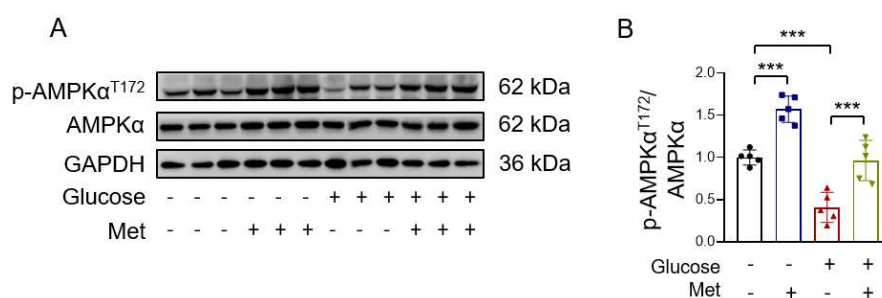

**Figure S3.** Metformin reverses high glucose-induced inhibition of AMPK phosphorylation in HUVECs. **(A, B)** Representative immunoblots **(A)** and quantification of AMPK phosphorylation **(B)** in HUVECs treated with 30 mM glucose and 10 mM metformin (Met). Data are means  $\pm$  SD. \*\*\*  $p < 0.001$ .

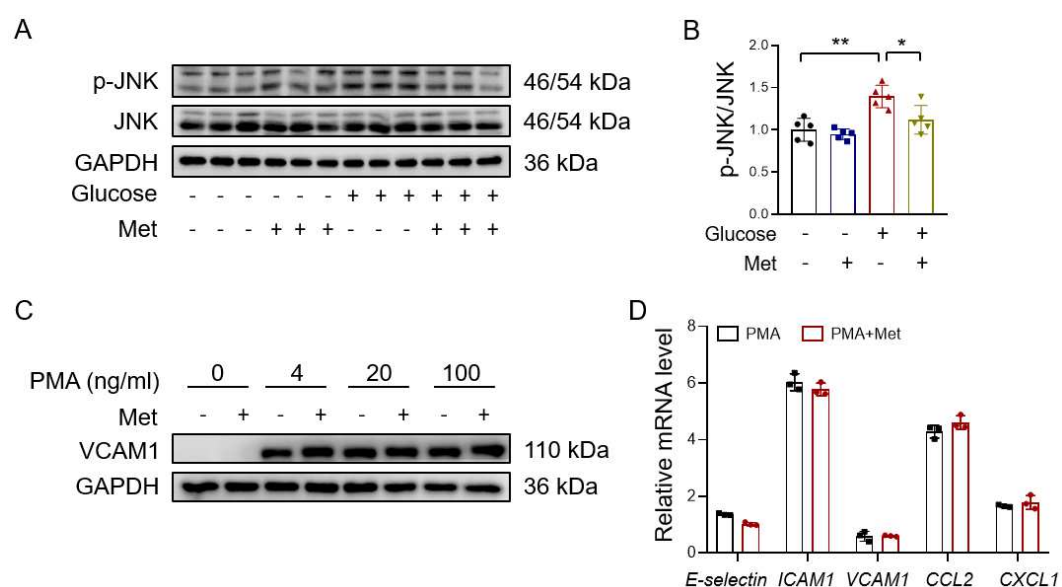

**Figure S4.** Metformin reduces vascular inflammation through YAP-JNK pathway. **(A, B)** Representative immunoblots **(A)** and quantification of JNK phosphorylation **(B)** in HUVECs treated with 30 mM glucose and 10 mM metformin (Met). **(C)** Representative immunoblots of VCAM1 and GAPDH in HUVECs treated with metformin and different concentrations of JNK stimulator PMA. **(D)** Quantification of the mRNA expression of pro-inflammatory genes (E-selectin, ICAM-1, VCAM-1, CCL2 and CXCL1) in HUVECs treated with PMA and metformin. Data are means  $\pm$  SD. \*  $p < 0.05$ , \*\*  $p < 0.01$ .
